# Supplementary material
Source: PubMed Central journal article supplement (PMC2663724)
Supplement: ehn567_1.pdf [file ehn567_1.pdf]

## **Supplementary Data**

**Development of life expectancy tables for people with type 2 diabetes.**

**Authors:** Jose Leal (1), Alastair M. Gray (1), Philip M. Clarke (2)

(1) Health Economics Research Centre, Department of Public Health, University of Oxford, UK (2) School of Public Health, University of Sydney, Australia

In the main section of the paper, we explained how the UKPDS Outcomes Model was used to predict the life expectancy of patients with type 2 diabetes, five years after diagnosis, stratified into the following risk groups: age (55, 65 and 75 years old), sex (male, female), systolic blood pressure (120, 140, 160, and 180mmHg), HbA1c (6%, 8% and 10%), ratio of total cholesterol/HDL (4 to 8) and smoking status (never smoked, current smoker). As the model is probabilistic, it was run 10,000 times to obtain stable point-estimates. To benefit the reader, in this section of the article we provide in Figure 1 the 95% confidence intervals around these estimates. Each cell was colour coded using the point-estimate (mean) and not the 95% confidence interval.

In addition, to demonstrate the variation in life expectancy due to duration of diabetes, we report in Figure 2 the life expectancy of 65 year old male and female patients at one, three, five and seven years after diagnosis.

**Figure 1. 95% Confidence intervals around life expectancy in men and women with type 2 diabetes. These men and women were assumed to have no previous diabetes-related complications, diagnosed with the disease five years previously, and a body mass index of 30 and 33 kg/m<sup>2</sup>, respectively.**

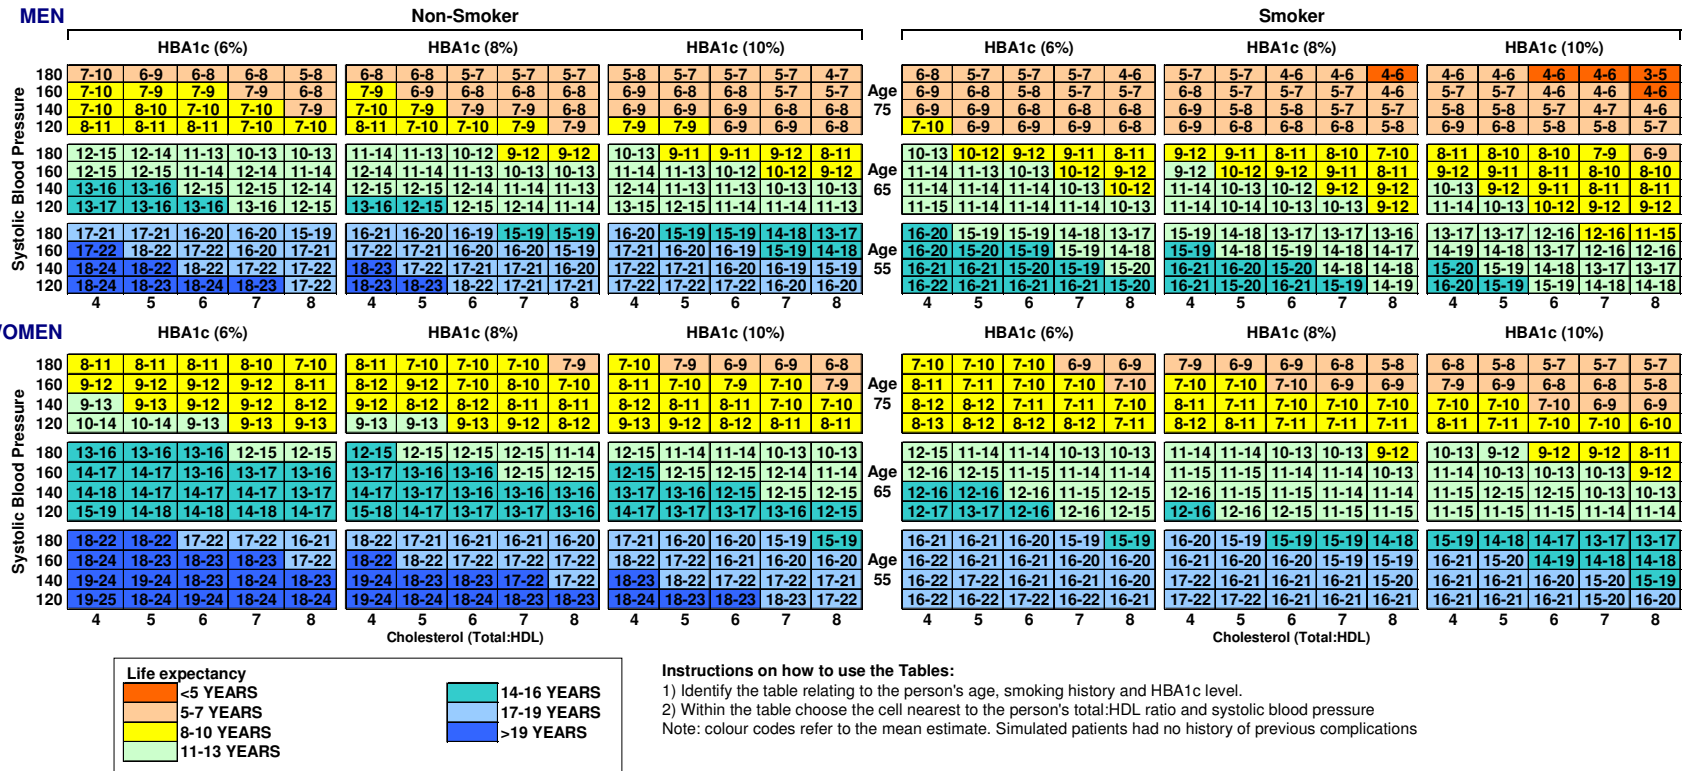

**Figure 2. Life expectancy in men and women with type 2 diabetes aged 65 years at one, three, five and seven years after diagnosis. These men and women were assumed to have no previous diabetes-related complications and a body mass index of 30 and 33 kg/m<sup>2</sup>, respectively.**

|                         |       | MEN        |      |            |      |             |      |            |      |            |      |             |      |      |      |      |      |      |      |      |      |      |      |      |      |      |      |      |      |      |      |      |
|-------------------------|-------|------------|------|------------|------|-------------|------|------------|------|------------|------|-------------|------|------|------|------|------|------|------|------|------|------|------|------|------|------|------|------|------|------|------|------|
|                         |       | Non-Smoker |      |            |      |             |      | Smoker     |      |            |      |             |      |      |      |      |      |      |      |      |      |      |      |      |      |      |      |      |      |      |      |      |
|                         |       | HBA1c (6%) |      | HBA1c (8%) |      | HBA1c (10%) |      | HBA1c (6%) |      | HBA1c (8%) |      | HBA1c (10%) |      |      |      |      |      |      |      |      |      |      |      |      |      |      |      |      |      |      |      |      |
| Systolic Blood Pressure | years | 180        | 160  | 140        | 120  | 180         | 160  | 140        | 120  | 180        | 160  | 140         | 120  | 180  | 160  | 140  | 120  |      |      |      |      |      |      |      |      |      |      |      |      |      |      |      |
|                         |       | 4          | 5    | 6          | 7    | 8           | 4    | 5          | 6    | 7          | 8    | 4           | 5    | 6    | 7    | 8    | 4    | 5    | 6    | 7    | 8    |      |      |      |      |      |      |      |      |      |      |      |
| Systolic Blood Pressure | 7     | 180        | 11.9 | 11.3       | 10.9 | 10.6        | 10.1 | 11.0       | 10.5 | 10.0       | 9.6  | 9.3         | 10.1 | 9.5  | 9.2  | 8.7  | 8.4  | 10.2 | 9.7  | 9.3  | 8.9  | 8.6  | 9.4  | 8.9  | 8.5  | 8.0  | 7.8  | 8.6  | 8.1  | 7.6  | 7.3  | 7.1  |
|                         |       | 160        | 12.4 | 12.1       | 11.6 | 11.3        | 11.0 | 11.8       | 11.3 | 10.8       | 10.6 | 10.2        | 10.9 | 10.3 | 9.9  | 9.6  | 9.2  | 10.9 | 10.3 | 10.0 | 9.6  | 9.2  | 10.2 | 9.7  | 9.3  | 8.9  | 8.4  | 9.3  | 8.9  | 8.3  | 8.0  | 7.7  |
|                         |       | 140        | 13.0 | 12.7       | 12.2 | 11.9        | 11.6 | 12.3       | 12.0 | 11.5       | 11.2 | 11.0        | 11.8 | 11.2 | 10.8 | 10.4 | 10.2 | 11.4 | 11.0 | 10.5 | 10.2 | 9.9  | 10.8 | 10.2 | 9.9  | 9.4  | 9.2  | 10.2 | 9.6  | 9.2  | 8.7  | 8.4  |
|                         | 5     | 180        | 13.4 | 13.1       | 12.8 | 12.4        | 12.2 | 12.9       | 12.6 | 12.1       | 11.9 | 11.4        | 12.4 | 11.9 | 11.5 | 11.0 | 10.8 | 11.8 | 11.5 | 11.2 | 10.7 | 10.5 | 11.3 | 10.8 | 10.5 | 10.2 | 9.8  | 10.8 | 10.2 | 9.8  | 9.4  | 9.1  |
|                         |       | 160        | 13.0 | 12.7       | 12.2 | 11.7        | 11.2 | 12.3       | 11.7 | 11.4       | 10.7 | 10.3        | 11.2 | 10.8 | 10.1 | 9.6  | 9.5  | 11.4 | 10.9 | 10.4 | 10.0 | 9.5  | 10.5 | 10.1 | 9.7  | 9.1  | 8.8  | 9.7  | 9.1  | 8.6  | 8.2  | 8.0  |
|                         |       | 140        | 13.8 | 13.4       | 13.1 | 12.6        | 11.9 | 13.3       | 12.6 | 12.2       | 11.7 | 11.2        | 12.2 | 11.6 | 11.1 | 10.7 | 10.4 | 12.1 | 11.7 | 11.2 | 10.7 | 10.3 | 11.3 | 10.8 | 10.3 | 9.9  | 9.5  | 10.4 | 10.1 | 9.5  | 9.0  | 8.7  |
|                         | 3     | 180        | 14.5 | 14.0       | 13.7 | 13.1        | 12.9 | 14.0       | 13.3 | 12.8       | 12.5 | 12.0        | 13.0 | 12.4 | 11.8 | 11.6 | 11.1 | 12.6 | 12.2 | 11.7 | 11.4 | 10.9 | 11.9 | 11.6 | 11.1 | 10.8 | 10.5 | 11.2 | 10.6 | 10.2 | 9.9  | 9.4  |
|                         |       | 160        | 14.9 | 14.6       | 14.1 | 13.8        | 13.4 | 14.4       | 14.0 | 13.5       | 13.2 | 12.7        | 13.6 | 13.1 | 12.8 | 12.3 | 11.9 | 13.1 | 12.8 | 12.5 | 12.1 | 11.7 | 12.7 | 12.1 | 11.7 | 11.3 | 10.9 | 11.8 | 11.4 | 10.8 | 10.5 | 10.1 |
|                         |       | 140        | 14.5 | 13.9       | 13.5 | 12.9        | 12.5 | 13.7       | 13.0 | 12.4       | 11.9 | 11.7        | 12.5 | 11.8 | 11.3 | 10.9 | 10.7 | 12.8 | 12.2 | 11.6 | 11.1 | 10.8 | 11.9 | 11.2 | 10.7 | 10.3 | 9.8  | 10.7 | 10.2 | 9.7  | 9.3  | 8.9  |
|                         | 1     | 180        | 15.3 | 14.8       | 14.3 | 14.0        | 13.5 | 14.5       | 14.0 | 13.5       | 13.0 | 12.6        | 13.6 | 12.9 | 12.3 | 11.9 | 11.6 | 13.5 | 13.1 | 12.4 | 11.9 | 11.6 | 12.6 | 12.1 | 11.6 | 11.2 | 10.7 | 11.8 | 11.1 | 10.6 | 10.2 | 9.6  |
|                         |       | 160        | 16.0 | 15.5       | 15.3 | 14.5        | 14.3 | 15.2       | 14.8 | 14.3       | 13.7 | 13.4        | 14.4 | 13.8 | 13.2 | 12.9 | 12.4 | 14.2 | 13.6 | 13.2 | 12.8 | 12.4 | 13.4 | 12.9 | 12.4 | 11.9 | 11.5 | 12.6 | 12.0 | 11.4 | 10.9 | 10.5 |
|                         |       | 140        | 16.5 | 16.0       | 15.7 | 15.2        | 14.8 | 15.9       | 15.4 | 14.9       | 14.5 | 14.1        | 15.1 | 14.5 | 14.1 | 13.6 | 13.2 | 14.5 | 14.2 | 13.8 | 13.5 | 12.9 | 14.0 | 13.5 | 13.1 | 12.6 | 12.2 | 13.3 | 12.8 | 12.1 | 11.9 | 11.2 |
|                         | 7     | 180        | 15.9 | 15.6       | 14.9 | 14.5        | 14.0 | 15.1       | 14.3 | 14.0       | 13.6 | 12.8        | 13.9 | 13.3 | 12.8 | 12.4 | 12.0 | 14.2 | 13.6 | 13.0 | 12.6 | 12.0 | 13.3 | 12.7 | 11.9 | 11.6 | 11.1 | 12.0 | 11.5 | 11.0 | 10.6 | 10.0 |
|                         |       | 160        | 16.9 | 16.5       | 16.0 | 15.3        | 14.9 | 16.1       | 15.5 | 14.8       | 14.4 | 13.9        | 14.9 | 14.3 | 13.7 | 13.3 | 12.8 | 15.2 | 14.3 | 13.9 | 13.4 | 13.1 | 14.4 | 13.6 | 13.0 | 12.4 | 11.9 | 12.9 | 12.4 | 11.8 | 11.4 | 11.0 |
|                         |       | 140        | 17.6 | 17.1       | 16.6 | 16.2        | 15.7 | 16.7       | 16.3 | 15.7       | 15.3 | 14.7        | 15.8 | 15.3 | 14.7 | 14.2 | 13.8 | 16.1 | 15.4 | 14.6 | 14.2 | 13.6 | 14.9 | 14.3 | 13.7 | 13.2 | 12.9 | 13.8 | 13.3 | 12.7 | 12.2 | 11.7 |
|                         | 5     | 180        | 18.1 | 17.7       | 17.3 | 17.0        | 16.5 | 17.4       | 16.9 | 16.4       | 16.0 | 15.5        | 16.7 | 16.1 | 15.6 | 14.9 | 14.7 | 15.8 | 15.7 | 15.2 | 14.9 | 14.5 | 15.5 | 15.0 | 14.4 | 13.9 | 13.6 | 14.6 | 14.1 | 13.5 | 12.9 | 12.7 |
|                         |       | 160        | 18.2 | 17.8       | 17.6 | 17.3        | 17.0 | 17.7       | 17.4 | 16.9       | 16.8 | 16.4        | 17.0 | 16.6 | 16.1 | 15.9 | 15.5 | 16.3 | 16.1 | 15.8 | 15.5 | 15.2 | 15.8 | 15.6 | 15.1 | 14.9 | 14.5 | 15.2 | 14.9 | 14.4 | 14.1 | 13.7 |
|                         |       | 140        | 18.2 | 17.8       | 17.6 | 17.3        | 17.0 | 17.7       | 17.4 | 16.9       | 16.8 | 16.4        | 17.0 | 16.6 | 16.1 | 15.9 | 15.5 | 16.3 | 16.1 | 15.8 | 15.5 | 15.2 | 15.8 | 15.6 | 15.1 | 14.9 | 14.5 | 15.2 | 14.9 | 14.4 | 14.1 | 13.7 |
|                         | 3     | 180        | 18.2 | 17.7       | 17.2 | 16.9        | 16.4 | 17.2       | 16.7 | 16.3       | 15.8 | 15.4        | 16.0 | 15.5 | 15.1 | 14.7 | 14.2 | 14.7 | 14.3 | 13.9 | 13.5 | 13.1 | 13.9 | 13.4 | 12.9 | 12.4 | 12.0 | 13.0 | 12.3 | 11.8 | 11.4 | 11.0 |
|                         |       | 160        | 17.3 | 16.9       | 16.5 | 16.1        | 15.9 | 16.6       | 16.1 | 15.5       | 15.2 | 14.9        | 15.6 | 15.0 | 14.7 | 14.2 | 13.8 | 15.4 | 15.0 | 14.6 | 14.3 | 13.9 | 14.6 | 14.1 | 13.8 | 13.3 | 13.0 | 13.7 | 13.4 | 12.9 | 12.4 | 11.9 |
|                         |       | 140        | 17.8 | 17.5       | 17.3 | 16.8        | 16.5 | 17.3       | 16.9 | 16.4       | 16.0 | 15.7        | 16.5 | 15.7 | 15.5 | 15.2 | 14.9 | 15.9 | 15.6 | 15.3 | 15.0 | 14.6 | 15.4 | 14.9 | 14.6 | 14.2 | 13.8 | 14.7 | 14.2 | 13.8 | 13.3 | 13.0 |
|                         | 1     | 180        | 18.2 | 17.8       | 17.6 | 17.3        | 17.0 | 17.7       | 17.4 | 16.9       | 16.8 | 16.4        | 17.0 | 16.6 | 16.1 | 15.9 | 15.5 | 16.3 | 16.1 | 15.8 | 15.5 | 15.2 | 15.8 | 15.6 | 15.1 | 14.9 | 14.5 | 15.2 | 14.9 | 14.4 | 14.1 | 13.7 |
|                         |       | 160        | 18.2 | 17.7       | 17.2 | 16.9        | 16.4 | 17.2       | 16.7 | 16.3       | 15.8 | 15.4        | 16.0 | 15.5 | 15.1 | 14.7 | 14.2 | 14.7 | 14.3 | 13.9 | 13.5 | 13.1 | 13.9 | 13.4 | 12.9 | 12.4 | 12.0 | 13.0 | 12.3 | 11.8 | 11.4 | 11.0 |
|                         |       | 140        | 19.0 | 18.4       | 18.0 | 17.7        | 17.4 | 18.2       | 17.6 | 17.2       | 16.8 | 16.3        | 17.3 | 16.8 | 16.2 | 15.7 | 15.1 | 17.2 | 16.7 | 16.2 | 15.8 | 15.3 | 16.3 | 15.7 | 15.4 | 14.9 | 14.5 | 15.3 | 14.8 | 14.2 | 13.9 | 13.5 |
| 7                       | 180   | 19.6       | 19.1 | 18.6       | 18.5 | 18.0        | 18.9 | 18.4       | 17.9 | 17.7       | 17.2 | 18.1        | 17.7 | 17.0 | 16.6 | 16.4 | 17.6 | 17.2 | 16.8 | 16.4 | 16.2 | 17.0 | 16.7 | 16.2 | 15.7 | 15.2 | 16.2 | 15.7 | 15.2 | 14.8 | 14.5 |      |
|                         | 160   | 19.7       | 19.6 | 19.3       | 19.0 | 18.8        | 19.4 | 18.9       | 18.8 | 18.3       | 17.9 | 18.7        | 18.3 | 17.9 | 17.5 | 17.2 | 18.1 | 17.8 | 17.4 | 16.9 | 16.7 | 17.6 | 17.1 | 16.7 | 16.3 | 16.1 | 16.9 | 16.4 | 16.0 | 15.4 | 15.2 |      |
|                         | 140   | 19.7       | 19.6 | 19.3       | 19.0 | 18.8        | 19.4 | 18.9       | 18.8 | 18.3       | 17.9 | 18.7        | 18.3 | 17.9 | 17.5 | 17.2 | 18.1 | 17.8 | 17.4 | 16.9 | 16.7 | 17.6 | 17.1 | 16.7 | 16.3 | 16.1 | 16.9 | 16.4 | 16.0 | 15.4 | 15.2 |      |

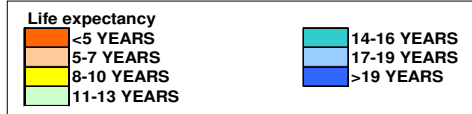

**Instructions on how to use the Tables:**  
 1) Identify the table relating to the person's age, smoking history and HBA1c level.  
 2) Within the table choose the cell nearest to the person's total:HDL ratio and systolic blood pressure.
